# Supplementary material for: Multiple Introductions and Distinct Genetic Groups of Canada Goldenrod (Solidago canadensis) in China Revealed by Genomic Single-Nucleotide Polymorphisms
Source: MDPI journal article supplement (doi:10.3390/plants12091734), 2023-04-22
Supplement: s1 [file s1]

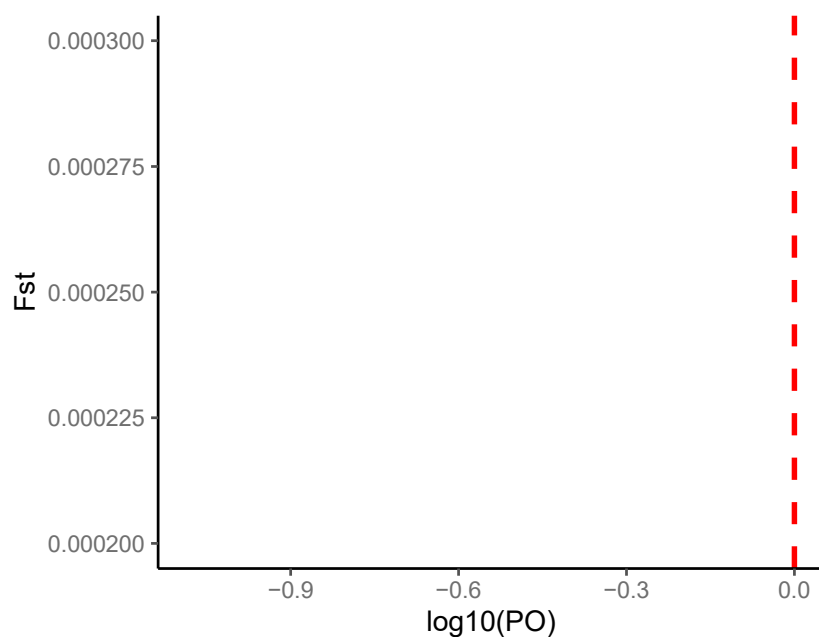

Figure S1. The result of BayeScan analysis based on the multinomial-Dirichlet model and the allele frequency difference between subpopulations. The red vertical line represents a zero value of  $\log_{10}(\text{posterior odd})$

Table S1. Information of 77 sequenced *Solidago canadensis* individuals

| Country | Province/State | City      | Longitude | Latitude | ID    | Data size (Gb) | Genetic group |
|---------|----------------|-----------|-----------|----------|-------|----------------|---------------|
| China   | Anhui          | Chuzhou   | 118.4022  | 32.1967  | AH-1  | 2.615          | Group2        |
| China   | Anhui          | Hefei     | 117.3792  | 31.7278  | AH-2  | 2.751          | Group2        |
| China   | Anhui          | Anqing    | 116.9486  | 30.7119  | AH-3  | 1.431          | Group2        |
| China   | Anhui          | Xuancheng | 118.9739  | 30.6125  | AH-4  | 1.890          | Group2        |
| China   | Anhui          | Xuancheng | 118.9739  | 30.6125  | AH-5  | 3.762          | Group1        |
| China   | Anhui          | Xuancheng | 118.9739  | 30.6125  | AH-6  | 3.468          | Group1        |
| China   | Anhui          | Huangshan | 118.2850  | 29.7281  | AH-7  | 2.957          | Group2        |
| China   | Anhui          | Bengbu    | 117.4047  | 32.9364  | AH-8  | 3.806          | Group2        |
| China   | Fujian         | Wuyishan  | 118.0100  | 27.2300  | FJ-1  | 1.247          | Group2        |
| China   | Fujian         | Ningde    | 118.7400  | 26.5600  | FJ-2  | 1.929          | Group2        |
| China   | Fujian         | Nanping   | 118.9800  | 27.1800  | FJ-3  | 1.376          | Group2        |
| China   | Fujian         | Sanming   | 117.5600  | 26.2400  | FJ-4  | 1.941          | Group2        |
| China   | Fujian         | Sanming   | 117.5600  | 26.2400  | FJ-5  | 3.560          | Group1        |
| China   | Fujian         | Sanming   | 117.5600  | 26.2400  | FJ-6  | 3.989          | Group1        |
| China   | Guangxi        | Guilin    | 110.2881  | 25.1567  | GX-1  | 1.772          | Group2        |
| China   | Guangxi        | Guilin    | 110.2881  | 25.1567  | GX-2  | 3.383          | Group1        |
| China   | Guangxi        | Guilin    | 110.2881  | 25.1567  | GX-3  | 3.072          | Group1        |
| China   | Henan          | Xinyang   | 114.9156  | 32.0008  | HEN-1 | 2.062          | Group2        |

|       |          |           |          |         |       |       |        |
|-------|----------|-----------|----------|---------|-------|-------|--------|
| China | Henan    | Xinyang   | 114.9156 | 32.0008 | HEN-2 | 3.660 | Group1 |
| China | Henan    | Xinyang   | 114.9156 | 32.0008 | HEN-3 | 3.554 | Group1 |
| China | Hubei    | Qianjiang | 112.9363 | 30.3943 | HB-1  | 2.308 | Group2 |
| China | Hubei    | Xiangyang | 112.0391 | 31.9937 | HB-2  | 1.917 | Group2 |
| China | Hubei    | Xiangyang | 112.0391 | 31.9937 | HB-3  | 3.482 | Group1 |
| China | Hubei    | Xiangyang | 112.0391 | 31.9937 | HB-4  | 3.428 | Group1 |
| China | Hunan    | Changsha  | 112.9500 | 28.1400 | HN-1  | 2.112 | Group2 |
| China | Hunan    | Loudi     | 111.9800 | 27.4200 | HN-2  | 3.018 | Group2 |
| China | Hunan    | Xiangtan  | 112.8800 | 27.8500 | HN-3  | 1.540 | Group2 |
| China | Jiangsu  | Nantong   | 120.8422 | 32.0715 | JS-1  | 3.735 | Group2 |
| China | Jiangsu  | Nantong   | 120.8422 | 32.0715 | JS-2  | 2.660 | Group1 |
| China | Jiangsu  | Nantong   | 120.8422 | 32.0715 | JS-3  | 2.966 | Group1 |
| China | Jiangsu  | Xuzhou    | 117.2953 | 34.1972 | JS-4  | 1.668 | Group2 |
| China | Jiangsu  | Changzhou | 119.9378 | 31.8781 | JS-5  | 3.680 | Group2 |
| China | Jiangsu  | Changzhou | 119.9378 | 31.8781 | JS-6  | 3.382 | Group1 |
| China | Jiangsu  | Changzhou | 119.9378 | 31.8781 | JS-7  | 4.091 | Group1 |
| China | Jiangsu  | Yangzhou  | 119.1586 | 32.3772 | JS-8  | 2.306 | Group2 |
| China | Jiangsu  | Yangzhou  | 119.1586 | 32.3772 | JS-9  | 3.860 | Group1 |
| China | Jiangsu  | Yangzhou  | 119.1586 | 32.3772 | JS-10 | 3.878 | Group1 |
| China | Jiangsu  | Taizhou   | 119.9742 | 32.5289 | JS-11 | 0.898 | Group2 |
| China | Jiangsu  | Suzhou    | 120.5828 | 31.3361 | JS-12 | 0.821 | Group2 |
| China | Jiangxi  | Jiujiang  | 116.0327 | 29.7330 | JX-1  | 1.932 | Group2 |
| China | Jiangxi  | Yingtan   | 117.0531 | 28.2719 | JX-2  | 2.896 | Group2 |
| China | Jiangxi  | Nanchang  | 115.8136 | 28.6636 | JX-3  | 1.915 | Group2 |
| China | Jiangxi  | Nanchang  | 115.8136 | 28.6636 | JX-4  | 4.015 | Group1 |
| China | Jiangxi  | Nanchang  | 115.8136 | 28.6636 | JX-5  | 3.527 | Group1 |
| China | Jiangxi  | Ji'an     | 115.2980 | 27.5950 | JX-6  | 2.462 | Group2 |
| China | Jiangxi  | Ganzhou   | 115.0589 | 25.9286 | JX-7  | 1.359 | Group2 |
| China | Jiangxi  | Pingxiang | 113.7636 | 27.6466 | JX-8  | 3.392 | Group2 |
| China | Jiangxi  | Pingxiang | 113.7636 | 27.6466 | JX-9  | 4.315 | Group1 |
| China | Jiangxi  | Pingxiang | 113.7636 | 27.6466 | JX-10 | 3.975 | Group1 |
| China | Jiangxi  | Fuzhou    | 115.7340 | 27.3843 | JX-11 | 3.427 | Group2 |
| China | Jiangxi  | Fuzhou    | 115.7340 | 27.3843 | JX-12 | 3.677 | Group1 |
| China | Jiangxi  | Fuzhou    | 115.7340 | 27.3843 | JX-13 | 3.352 | Group1 |
| China | Yunnan   | Kunming   | 102.6500 | 24.9100 | YN-1  | 3.429 | Group2 |
| China | Yunnan   | Kunming   | 102.6500 | 24.9100 | YN-2  | 3.398 | Group1 |
| China | Yunnan   | Kunming   | 102.6500 | 24.9100 | YN-3  | 3.307 | Group1 |
| China | Zhejiang | Ningbo    | 121.1762 | 30.3600 | ZJ-1  | 2.299 | Group2 |
| China | Zhejiang | Jinhua    | 119.8701 | 28.9300 | ZJ-2  | 1.183 | Group2 |
| China | Zhejiang | Jinhua    | 119.8701 | 28.9300 | ZJ-3  | 3.533 | Group1 |

|             |          |              |          |         |       |       |        |
|-------------|----------|--------------|----------|---------|-------|-------|--------|
| China       | Zhejiang | Jinhua       | 119.8701 | 28.9300 | ZJ-4  | 3.852 | Group1 |
| China       | Zhejiang | Huzhou       | 120.3993 | 30.7400 | ZJ-5  | 3.862 | Group1 |
| China       | Zhejiang | Huzhou       | 120.3993 | 30.7400 | ZJ-6  | 3.901 | Group1 |
| China       | Zhejiang | Huzhou       | 120.3993 | 30.7400 | ZJ-7  | 1.877 | Group2 |
| China       | Zhejiang | Zhoushan     | 121.9980 | 30.0500 | ZJ-8  | 1.880 | Group2 |
| China       | Zhejiang | Jiaxing      | 121.0270 | 30.6000 | ZJ-9  | 2.368 | Group2 |
| China       | Zhejiang | Shaoxing     | 120.5164 | 30.1500 | ZJ-10 | 3.764 | Group2 |
| China       | Zhejiang | Lishui       | 119.5945 | 28.0978 | ZJ-11 | 1.180 | Group2 |
| China       | -        | Shanghai     | 121.3080 | 31.2064 | SH-1  | 2.746 | Group1 |
| China       | -        | Shanghai     | 121.3080 | 31.2064 | SH-2  | 2.842 | Group1 |
| China       | -        | Shanghai     | 121.8002 | 31.1622 | SH-3  | 3.042 | Group1 |
| China       | -        | Shanghai     | 121.8002 | 31.1622 | SH-4  | 1.985 | Group2 |
| Japan       | Kyushu   | Fukuoka      | 130.7121 | 33.7835 | JP-1  | 1.714 | Group2 |
| Japan       | Kyushu   | Fukuoka      | 130.7406 | 33.7270 | JP-2  | 2.744 | Group2 |
| Switzerland | Aargau   | Elfingen     | 8.3477   | 47.4470 | SW-1  | 2.271 | Group2 |
| USA         | Kentucky | Simpsonville | -85.3300 | 38.2036 | NA-KY | 1.049 | Group2 |
| USA         | Maine    | Portland     | -70.3186 | 43.6533 | NA-ME | 1.374 | Group2 |
| USA         | Michigan | Stevensville | -86.5175 | 42.0314 | NA-MI | 0.857 | Group2 |
| USA         | Ohio     | Salem        | -80.7570 | 40.5980 | NA-OH | 0.979 | Group2 |

Table S2. Cross-validation errors in ADMIXTURE analysis

| $K$ | Cross-validation error |
|-----|------------------------|
| 2   | 0.4289                 |
| 3   | 0.4531                 |
| 4   | 0.4952                 |
| 5   | 0.5340                 |
| 6   | 0.5978                 |
| 7   | 0.6304                 |
| 8   | 0.7052                 |
| 9   | 0.7625                 |
| 10  | 0.8183                 |
